# Supplementary material for: High-throughput screening of carbon nitride single-atom catalysts for nitrogen fixation based on machine learning
Source: Royal Society of Chemistry journal article supplement (doi:10.1039/d4ta04370g), 2024-01-01
Supplement: d4ta04370g1.pdf [file d4ta04370g1.pdf]

## SUPPLEMENTARY INFORMATION (SI)

### High-throughput screening of carbon nitride single-atom catalysts for nitrogen fixation based on machine learning

LinTao Xu<sup>1</sup>, Yuhong Huang<sup>1,\*</sup>, Haiping Lin<sup>1</sup>, Ruhai Du<sup>1</sup>, Min Wang<sup>1</sup>, Fei Ma<sup>2,\*</sup>,  
Xiumei Wei<sup>1</sup>, Gangqiang Zhu<sup>1</sup>, Jianmin Zhang<sup>1</sup>

<sup>1</sup> School of Physics & Information Technology, Shaanxi Normal University, Xi'an 710119, Shaanxi, China

<sup>2</sup> State Key Laboratory for Mechanical Behavior of Materials, Xi'an Jiaotong University, Xi'an 710049, Shaanxi, China

**Table S1**  $\Delta G^*_{N_2-end}$ ,  $\Delta G^*_{N_2-side}$ ,  $\Delta G^*_{N_2-N_2H}$ ,  $\Delta E_{ad}[N_2H]$  and  $N\equiv N$  of 140 SACs.

| SACs                  | $\Delta G^*_{N_2-end}$<br>(eV) | $\Delta G^*_{N_2-side}$<br>(eV) | $\Delta G^*_{N_2-N_2H}$<br>(eV) | $\Delta G^*_{NH_2-NH}$<br>(eV) | $\Delta E_{ad}[N_2H]$<br>(eV) | $N\equiv N$<br>(Å) |
|-----------------------|--------------------------------|---------------------------------|---------------------------------|--------------------------------|-------------------------------|--------------------|
| Sc@g-C <sub>2</sub> N | -0.403                         | -0.128                          | 1.078                           | 0.029                          | 0.338                         | 1.130              |
| Ti@g-C <sub>2</sub> N | -0.559                         | -0.155                          | 0.797                           | -0.052                         | -0.128                        | 1.136              |
| V@g-C <sub>2</sub> N  | -0.310                         | 0.182                           | 0.946                           | -0.338                         | 0.280                         | 1.132              |
| Cr@g-C <sub>2</sub> N | -0.037                         | -0.037                          | 1.168                           | -0.577                         | 0.805                         | 1.125              |
| Mn@g-C <sub>2</sub> N | -0.082                         | 0.232                           | 1.196                           | -0.870                         | 0.765                         | 1.123              |
| Fe@g-C <sub>2</sub> N | -0.460                         | 0.068                           | 1.357                           | -0.807                         | 0.556                         | 1.133              |
| Co@g-C <sub>2</sub> N | -0.595                         | -0.048                          | 1.269                           | -0.993                         | 0.282                         | 1.132              |
| Ni@g-C <sub>2</sub> N | -0.283                         | /                               | 1.258                           | -1.203                         | 0.580                         | 1.129              |
| Cu@g-C <sub>2</sub> N | -0.347                         | 0.116                           | 1.906                           | -1.526                         | 1.221                         | 1.123              |
| Zn@g-C <sub>2</sub> N | 0.005                          | /                               | 1.516                           | -1.182                         | 1.190                         | 1.116              |
| Y@g-C <sub>2</sub> N  | -0.340                         | -0.115                          | 1.127                           | 0.162                          | 0.474                         | 1.130              |
| Zr@g-C <sub>2</sub> N | -0.807                         | -0.418                          | 0.635                           | 0.425                          | -0.538                        | 1.142              |
| Nb@g-C <sub>2</sub> N | -0.659                         | -0.141                          | 0.428                           | 0.166                          | -0.622                        | 1.145              |
| Mo@g-C <sub>2</sub> N | 0.008                          | 0.098                           | 0.478                           | 0.055                          | 0.099                         | 1.145              |
| Ru@g-C <sub>2</sub> N | -0.519                         | 0.067                           | 0.975                           | -0.588                         | 0.061                         | 1.139              |
| Rh@g-C <sub>2</sub> N | -0.163                         | /                               | 1.313                           | -1.046                         | 0.730                         | 1.128              |
| Pd@g-C <sub>2</sub> N | 0.070                          | /                               | 1.327                           | -1.175                         | 1.002                         | 1.126              |
| Ag@g-C <sub>2</sub> N | 0.276                          | /                               | 2.071                           | -1.769                         | 2.081                         | 1.115              |

\*Corresponding authors. Tel.: +86 29 81530750, E-mail: huangyh@snnu.edu.cn (Y.H. Huang),  
+86 29 82668610, E-mail: mafei@mail.xjtu.edu.cn (F. Ma).

|                                    |        |        |       |        |        |       |
|------------------------------------|--------|--------|-------|--------|--------|-------|
| Cd@g-C <sub>2</sub> N              | 0.258  | /      | 1.708 | -1.063 | 1.631  | 1.113 |
| Hf@g-C <sub>2</sub> N              | -0.744 | -0.412 | 0.561 | 0.675  | -0.545 | 1.145 |
| Ta@g-C <sub>2</sub> N              | -0.813 | -0.291 | 0.239 | 0.311  | -0.963 | 1.150 |
| W@g-C <sub>2</sub> N               | -0.650 | -0.296 | 0.289 | -0.047 | -0.755 | 1.149 |
| Re@g-C <sub>2</sub> N              | -0.952 | -0.521 | 0.496 | -0.214 | -0.847 | 1.146 |
| Os@g-C <sub>2</sub> N              | -0.684 | 0.045  | 0.784 | -0.542 | -0.331 | 1.139 |
| Ir@g-C <sub>2</sub> N              | -0.472 | /      | 1.045 | -0.883 | 0.119  | 1.131 |
| Pt@g-C <sub>2</sub> N              | -0.355 | /      | 1.011 | -0.844 | 0.235  | 1.130 |
| Au@g-C <sub>2</sub> N              | /      | /      | /     | /      | /      | /     |
| Hg@g-C <sub>2</sub> N              | /      | /      | /     | /      | /      | /     |
| Sc@g-C <sub>3</sub> N <sub>4</sub> | -0.473 | -0.257 | 1.061 | 0.400  | 0.265  | 1.135 |
| Ti@g-C <sub>3</sub> N <sub>4</sub> | -0.570 | -0.050 | 0.747 | 0.085  | -0.187 | 1.140 |
| V@g-C <sub>3</sub> N <sub>4</sub>  | -0.208 | 0.292  | 0.811 | -0.146 | 0.232  | 1.137 |
| Cr@g-C <sub>3</sub> N <sub>4</sub> | 0.101  | /      | 1.181 | -0.471 | 0.922  | 1.123 |
| Mn@g-C <sub>3</sub> N <sub>4</sub> | -0.005 | 0.251  | 1.270 | -0.559 | 0.935  | 1.127 |
| Fe@g-C <sub>3</sub> N <sub>4</sub> | -0.535 | -0.060 | 1.340 | -0.359 | 0.431  | 1.137 |
| Co@g-C <sub>3</sub> N <sub>4</sub> | -0.567 | -0.105 | 1.139 | -0.672 | 0.177  | 1.135 |
| Ni@g-C <sub>3</sub> N <sub>4</sub> | -0.397 | -0.395 | 1.144 | -0.778 | 0.347  | 1.137 |
| Cu@g-C <sub>3</sub> N <sub>4</sub> | -0.519 | /      | 2.001 | -1.060 | 1.153  | 1.126 |
| Zn@g-C <sub>3</sub> N <sub>4</sub> | 0.042  | /      | 1.093 | -0.277 | 0.772  | 1.117 |
| Y@g-C <sub>3</sub> N <sub>4</sub>  | -0.329 | -0.106 | 1.111 | 0.246  | 0.494  | 1.133 |
| Zr@g-C <sub>3</sub> N <sub>4</sub> | -0.607 | -0.267 | 0.538 | 0.727  | -0.425 | 1.147 |
| Nb@g-C <sub>3</sub> N <sub>4</sub> | -0.505 | 0.088  | 0.300 | 0.422  | -0.581 | 1.153 |
| Mo@g-C <sub>3</sub> N <sub>4</sub> | -0.631 | 0.348  | 0.819 | 0.053  | -0.200 | 1.149 |
| Ru@g-C <sub>3</sub> N <sub>4</sub> | -0.404 | 0.057  | 0.387 | -0.388 | -0.412 | 1.138 |
| Rh@g-C <sub>3</sub> N <sub>4</sub> | -0.950 | -0.950 | 1.306 | -0.960 | -0.034 | 1.132 |
| Pd@g-C <sub>3</sub> N <sub>4</sub> | -0.288 | /      | 1.400 | -1.069 | 0.719  | 1.133 |
| Ag@g-C <sub>3</sub> N <sub>4</sub> | /      | /      | /     | /      | /      | /     |
| Cd@g-C <sub>3</sub> N <sub>4</sub> | 0.242  | /      | 1.778 | -0.567 | 1.628  | 1.113 |
| Hf@g-C <sub>3</sub> N <sub>4</sub> | -0.612 | -0.290 | 0.456 | 0.880  | -0.512 | 1.154 |
| Ta@g-C <sub>3</sub> N <sub>4</sub> | -0.654 | -0.121 | 0.134 | 0.687  | -0.895 | 1.157 |
| W@g-C <sub>3</sub> N <sub>4</sub>  | -0.926 | 0.030  | 0.551 | 0.422  | -0.769 | 1.155 |
| Re@g-C <sub>3</sub> N <sub>4</sub> | -0.563 | -0.176 | 0.625 | 0.151  | -0.306 | 1.149 |
| Os@g-C <sub>3</sub> N <sub>4</sub> | -0.726 | 0.004  | 0.817 | -0.255 | -0.340 | 1.143 |
| Ir@g-C <sub>3</sub> N <sub>4</sub> | -0.467 | /      | 1.512 | -0.688 | 0.623  | 1.135 |
| Pt@g-C <sub>3</sub> N <sub>4</sub> | /      | /      | /     | /      | /      | /     |
| Au@g-C <sub>3</sub> N <sub>4</sub> | /      | /      | /     | /      | /      | /     |
| Hg@g-C <sub>3</sub> N <sub>4</sub> | /      | /      | /     | /      | /      | /     |
| Sc@g-C <sub>4</sub> N <sub>3</sub> | -0.144 | /      | 1.708 | -1.079 | 1.276  | 1.115 |
| Ti@g-C <sub>4</sub> N <sub>3</sub> | -0.166 | 0.217  | 0.938 | -0.297 | 0.407  | 1.124 |
| V@g-C <sub>4</sub> N <sub>3</sub>  | -0.234 | 0.740  | 0.935 | -0.711 | 0.332  | 1.125 |
| Cr@g-C <sub>4</sub> N <sub>3</sub> | 0.152  | /      | 1.385 | -1.020 | 1.140  | 1.117 |
| Mn@g-C <sub>4</sub> N <sub>3</sub> | 0.121  | /      | 1.677 | -1.451 | 1.481  | 1.113 |

|                                    |        |        |        |        |        |       |
|------------------------------------|--------|--------|--------|--------|--------|-------|
| Fe@g-C <sub>4</sub> N <sub>3</sub> | -0.135 | /      | 1.307  | -1.210 | 0.813  | 1.119 |
| Co@g-C <sub>4</sub> N <sub>3</sub> | -0.156 | 0.311  | 1.248  | -1.317 | 0.683  | 1.124 |
| Ni@g-C <sub>4</sub> N <sub>3</sub> | 0.050  | /      | 1.442  | -1.456 | 1.102  | 1.121 |
| Cu@g-C <sub>4</sub> N <sub>3</sub> | 0.290  | /      | 1.615  | -1.575 | 1.500  | 1.120 |
| Zn@g-C <sub>4</sub> N <sub>3</sub> | 0.310  | /      | 2.155  | -1.815 | 2.051  | 1.113 |
| Y@g-C <sub>4</sub> N <sub>3</sub>  | -0.094 | /      | 1.905  | -1.399 | 1.529  | 1.114 |
| Zr@g-C <sub>4</sub> N <sub>3</sub> | -0.445 | 0.070  | 1.067  | -0.065 | 0.287  | 1.124 |
| Nb@g-C <sub>4</sub> N <sub>3</sub> | -0.412 | 0.158  | 0.479  | 0.163  | -0.299 | 1.137 |
| Mo@g-C <sub>4</sub> N <sub>3</sub> | -0.076 | 0.702  | 0.142  | 0.056  | -0.331 | 1.141 |
| Ru@g-C <sub>4</sub> N <sub>3</sub> | -0.403 | /      | 1.058  | -0.920 | 0.281  | 1.134 |
| Rh@g-C <sub>4</sub> N <sub>3</sub> | 0.176  | /      | 0.902  | -1.143 | 0.661  | 1.125 |
| Pd@g-C <sub>4</sub> N <sub>3</sub> | /      | /      | /      | /      | /      | /     |
| Ag@g-C <sub>4</sub> N <sub>3</sub> | /      | /      | /      | /      | /      | /     |
| Cd@g-C <sub>4</sub> N <sub>3</sub> | 0.328  | /      | 2.031  | -2.137 | 2.081  | 1.113 |
| Hf@g-C <sub>4</sub> N <sub>3</sub> | -0.549 | -0.003 | 0.973  | 0.026  | 0.073  | 1.127 |
| Ta@g-C <sub>4</sub> N <sub>3</sub> | -0.420 | 0.002  | 0.270  | 0.602  | -0.515 | 1.145 |
| W@g-C <sub>4</sub> N <sub>3</sub>  | -0.368 | 0.273  | -0.117 | 0.150  | -0.890 | 1.147 |
| Re@g-C <sub>4</sub> N <sub>3</sub> | -0.712 | 0.585  | 0.485  | -0.148 | -0.629 | 1.143 |
| Os@g-C <sub>4</sub> N <sub>3</sub> | -0.613 | -0.613 | 0.890  | -0.627 | -0.106 | 1.138 |
| Ir@g-C <sub>4</sub> N <sub>3</sub> | -0.110 | /      | 0.730  | -0.992 | 0.193  | 1.131 |
| Pt@g-C <sub>4</sub> N <sub>3</sub> | /      | /      | /      | /      | /      | /     |
| Au@g-C <sub>4</sub> N <sub>3</sub> | /      | /      | /      | /      | /      | /     |
| Hg@g-C <sub>4</sub> N <sub>3</sub> | /      | /      | /      | /      | /      | /     |
| Sc@g-C <sub>6</sub> N <sub>6</sub> | -0.362 | -0.069 | 1.088  | 0.032  | 0.391  | 1.130 |
| Ti@g-C <sub>6</sub> N <sub>6</sub> | -0.556 | -0.152 | 0.818  | -0.044 | -0.103 | 1.136 |
| V@g-C <sub>6</sub> N <sub>6</sub>  | -0.329 | 0.289  | 0.910  | -0.309 | 0.228  | 1.132 |
| Cr@g-C <sub>6</sub> N <sub>6</sub> | -0.035 | /      | 1.094  | -0.717 | 0.680  | 1.125 |
| Mn@g-C <sub>6</sub> N <sub>6</sub> | -0.014 | 0.305  | 1.226  | -0.779 | 0.859  | 1.124 |
| Fe@g-C <sub>6</sub> N <sub>6</sub> | 0.181  | 0.161  | 0.777  | -1.116 | 0.579  | 1.136 |
| Co@g-C <sub>6</sub> N <sub>6</sub> | -0.514 | 0.046  | 1.275  | -0.891 | 0.367  | 1.133 |
| Ni@g-C <sub>6</sub> N <sub>6</sub> | -0.187 | /      | 1.295  | -1.189 | 0.712  | 1.129 |
| Cu@g-C <sub>6</sub> N <sub>6</sub> | -0.287 | /      | 1.790  | -1.436 | 1.168  | 1.124 |
| Zn@g-C <sub>6</sub> N <sub>6</sub> | 0.076  | /      | 1.518  | -1.073 | 1.262  | 1.115 |
| Y@g-C <sub>6</sub> N <sub>6</sub>  | -0.298 | -0.051 | 1.130  | 0.092  | 0.543  | 1.130 |
| Zr@g-C <sub>6</sub> N <sub>6</sub> | -0.820 | -0.447 | 0.637  | 0.334  | -0.541 | 1.140 |
| Nb@g-C <sub>6</sub> N <sub>6</sub> | -0.795 | -0.118 | 0.422  | 0.315  | -0.770 | 1.145 |
| Mo@g-C <sub>6</sub> N <sub>6</sub> | -0.436 | 0.047  | 0.540  | -0.195 | -0.286 | 1.142 |
| Ru@g-C <sub>6</sub> N <sub>6</sub> | -0.610 | 0.079  | 1.054  | -0.671 | 0.037  | 1.136 |
| Rh@g-C <sub>6</sub> N <sub>6</sub> | -0.249 | /      | 1.372  | -1.168 | 0.699  | 1.127 |
| Pd@g-C <sub>6</sub> N <sub>6</sub> | 0.046  | /      | 1.414  | -1.313 | 1.066  | 1.127 |
| Ag@g-C <sub>6</sub> N <sub>6</sub> | /      | /      | /      | /      | /      | /     |
| Cd@g-C <sub>6</sub> N <sub>6</sub> | 0.221  | /      | 1.779  | -1.023 | 1.673  | 1.113 |
| Hf@g-C <sub>6</sub> N <sub>6</sub> | -0.783 | -0.452 | 0.588  | 0.564  | -0.556 | 1.144 |

|                                     |        |        |       |        |        |       |
|-------------------------------------|--------|--------|-------|--------|--------|-------|
| Ta@g-C <sub>6</sub> N <sub>6</sub>  | -0.869 | -0.229 | 0.295 | 0.403  | -0.975 | 1.148 |
| W@g-C <sub>6</sub> N <sub>6</sub>   | -0.742 | -0.323 | 0.311 | 0.013  | -0.829 | 1.147 |
| Re@g-C <sub>6</sub> N <sub>6</sub>  | -0.872 | -0.370 | 0.507 | 0.020  | -0.756 | 1.145 |
| Os@g-C <sub>6</sub> N <sub>6</sub>  | -1.336 | -0.583 | 0.858 | -0.566 | -0.906 | 1.138 |
| Ir@g-C <sub>6</sub> N <sub>6</sub>  | -0.508 | /      | 1.088 | -0.943 | 0.129  | 1.130 |
| Pt@g-C <sub>6</sub> N <sub>6</sub>  | /      | /      | /     | /      | /      | /     |
| Au@g-C <sub>6</sub> N <sub>6</sub>  | /      | /      | /     | /      | /      | /     |
| Hg@g-C <sub>6</sub> N <sub>6</sub>  | /      | /      | /     | /      | /      | /     |
| Sc@g-C <sub>9</sub> N <sub>10</sub> | -0.378 | -0.205 | 1.047 | -0.253 | 0.333  | 1.129 |
| Ti@g-C <sub>9</sub> N <sub>10</sub> | -0.539 | -0.093 | 0.727 | -0.375 | -0.191 | 1.136 |
| V@g-C <sub>9</sub> N <sub>10</sub>  | -0.524 | -0.017 | 0.895 | -0.701 | -0.011 | 1.126 |
| Cr@g-C <sub>9</sub> N <sub>10</sub> | -0.524 | /      | 0.835 | -0.946 | -0.074 | 1.120 |
| Mn@g-C <sub>9</sub> N <sub>10</sub> | -0.26  | /      | 0.685 | -0.978 | 0.008  | 1.119 |
| Fe@g-C <sub>9</sub> N <sub>10</sub> | -0.488 | -0.069 | 0.551 | -0.908 | -0.311 | 1.131 |
| Co@g-C <sub>9</sub> N <sub>10</sub> | -0.723 | -0.025 | 0.751 | -1.015 | -0.373 | 1.124 |
| Ni@g-C <sub>9</sub> N <sub>10</sub> | -0.65  | /      | 1.029 | -1.320 | -0.023 | 1.123 |
| Cu@g-C <sub>9</sub> N <sub>10</sub> | -0.573 | /      | /     | /      | /      | /     |
| Zn@g-C <sub>9</sub> N <sub>10</sub> | -0.299 | /      | 0.962 | -1.113 | 0.334  | 1.117 |
| Y@g-C <sub>9</sub> N <sub>10</sub>  | -0.346 | -0.189 | 1.096 | -0.158 | 0.431  | 1.130 |
| Zr@g-C <sub>9</sub> N <sub>10</sub> | -0.532 | -0.289 | 0.422 | 0.066  | -0.487 | 1.144 |
| Nb@g-C <sub>9</sub> N <sub>10</sub> | -0.587 | -0.344 | 0.410 | -0.186 | -0.569 | 1.144 |
| Mo@g-C <sub>9</sub> N <sub>10</sub> | -0.243 | 0.177  | 0.390 | -1.057 | -0.241 | 1.145 |
| Ru@g-C <sub>9</sub> N <sub>10</sub> | -0.941 | -0.250 | 0.849 | -0.948 | -0.495 | 1.128 |
| Rh@g-C <sub>9</sub> N <sub>10</sub> | -0.879 | /      | /     | /      | /      | /     |
| Pd@g-C <sub>9</sub> N <sub>10</sub> | -0.438 | /      | 1.338 | -1.368 | 0.537  | 1.119 |
| Ag@g-C <sub>9</sub> N <sub>10</sub> | 0.011  | /      | 2.054 | -1.973 | 1.753  | 1.115 |
| Cd@g-C <sub>9</sub> N <sub>10</sub> | 0.027  | /      | 1.765 | -1.396 | 1.486  | 1.113 |
| Hf@g-C <sub>9</sub> N <sub>10</sub> | -0.430 | -0.243 | 0.367 | 0.058  | -0.434 | 1.151 |
| Ta@g-C <sub>9</sub> N <sub>10</sub> | -0.673 | -0.513 | 0.204 | 0.031  | -0.857 | 1.150 |
| W@g-C <sub>9</sub> N <sub>10</sub>  | -0.974 | -0.335 | 0.273 | -0.397 | -1.138 | 1.132 |
| Re@g-C <sub>9</sub> N <sub>10</sub> | -1.035 | -0.874 | 0.340 | -0.299 | -1.117 | 1.143 |
| Os@g-C <sub>9</sub> N <sub>10</sub> | -1.182 | -0.596 | 0.597 | -0.802 | -0.999 | 1.132 |
| Ir@g-C <sub>9</sub> N <sub>10</sub> | -1.270 | /      | 0.631 | -0.845 | -1.084 | 1.127 |
| Pt@g-C <sub>9</sub> N <sub>10</sub> | /      | /      | /     | /      | /      | /     |
| Au@g-C <sub>9</sub> N <sub>10</sub> | /      | /      | /     | /      | /      | /     |
| Hg@g-C <sub>9</sub> N <sub>10</sub> | /      | /      | /     | /      | /      | /     |

**Table S2** The  $\Delta G^*_{N_2}$  and  $\Delta G^*_{H}$  values of SACs considered in the competitive reactions of

HER and NRR.

| SACs                                | $\Delta G^*_{N_2}$ (eV) | $\Delta G^*_{H}$ (eV) |
|-------------------------------------|-------------------------|-----------------------|
| Nb@g-C <sub>2</sub> N               | -0.659                  | -0.347                |
| Ta@g-C <sub>2</sub> N               | -0.813                  | -0.671                |
| W@g-C <sub>2</sub> N                | -0.650                  | -0.540                |
| Re@g-C <sub>2</sub> N               | -0.952                  | -0.771                |
| Nb@g-C <sub>3</sub> N <sub>4</sub>  | -0.505                  | -0.297                |
| Ru@g-C <sub>3</sub> N <sub>4</sub>  | -0.404                  | -1.023                |
| Ta@g-C <sub>3</sub> N <sub>4</sub>  | -0.654                  | -0.562                |
| Nb@g-C <sub>4</sub> N <sub>3</sub>  | -0.412                  | -0.285                |
| Mo@g-C <sub>4</sub> N <sub>3</sub>  | -0.076                  | -0.339                |
| Ta@g-C <sub>4</sub> N <sub>3</sub>  | -0.420                  | -0.617                |
| W@g-C <sub>4</sub> N <sub>3</sub>   | -0.368                  | -0.456                |
| Re@g-C <sub>4</sub> N <sub>3</sub>  | -0.712                  | -0.563                |
| Nb@g-C <sub>6</sub> N <sub>6</sub>  | -0.795                  | -0.448                |
| Mo@g-C <sub>6</sub> N <sub>6</sub>  | -0.436                  | -0.226                |
| Ta@g-C <sub>6</sub> N <sub>6</sub>  | -0.869                  | -0.690                |
| W@g-C <sub>6</sub> N <sub>6</sub>   | -0.742                  | -0.698                |
| Re@g-C <sub>6</sub> N <sub>6</sub>  | -0.872                  | -0.767                |
| Zr@g-C <sub>9</sub> N <sub>10</sub> | -0.532                  | -0.482                |
| Nb@g-C <sub>9</sub> N <sub>10</sub> | -0.587                  | -0.362                |
| Mo@g-C <sub>9</sub> N <sub>10</sub> | -0.243                  | -0.163                |
| Hf@g-C <sub>9</sub> N <sub>10</sub> | -0.430                  | -0.641                |
| Ta@g-C <sub>9</sub> N <sub>10</sub> | -0.673                  | -0.632                |
| W@g-C <sub>9</sub> N <sub>10</sub>  | -0.974                  | -0.539                |
| Re@g-C <sub>9</sub> N <sub>10</sub> | -1.035                  | -0.651                |

**Table S3** Intrinsic properties of catalysts and adsorption intermediates.

| category                         | feature                         | symbol      |
|----------------------------------|---------------------------------|-------------|
| center metals                    | 1st ionization energy           | $I_1$       |
|                                  | number of outermost d electrons | $N_d$       |
|                                  | atomic number                   | $Z$         |
|                                  | unpaired d-electron number      | $N_{ie-d}$  |
|                                  | Pauling electronegativity       | $\chi$      |
| coordination environments        | number of N atoms               | $N_N$       |
|                                  | number of C atoms               | $N_C$       |
|                                  | number of coordinative N atoms  | $N_n$       |
| intermediates (*N <sub>2</sub> ) | N≡N bond length                 | $N\equiv N$ |
|                                  | TM-N bond length                | $TM-N$      |

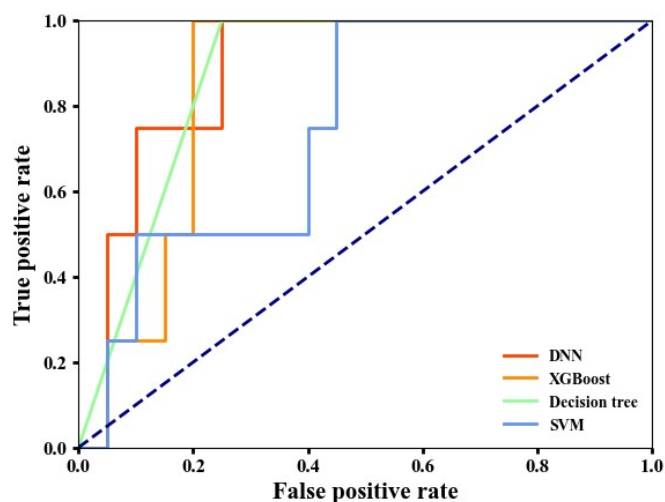

**Fig. S1** The ROC curves of the DNN, XGBoost, decision tree and SVM classification models.

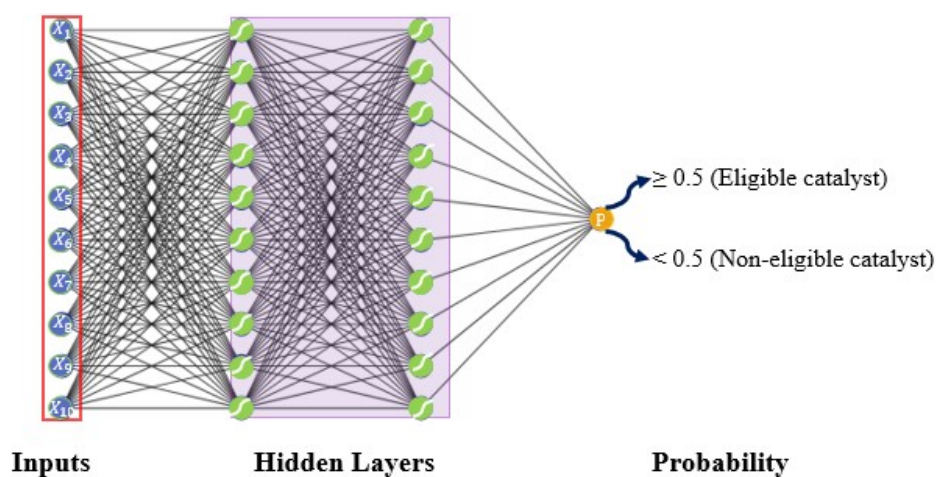

**Fig. S2** DNN classification model constructed in this study (each hidden layer has ten neurons), with input data consisting of optimized adsorbed nitrogen intermediates, each structure has ten features:

$$I_1, N_d, Z, \chi, N_{ie-d}, N_N, N_C, N_n, N \equiv N, TM-N.$$

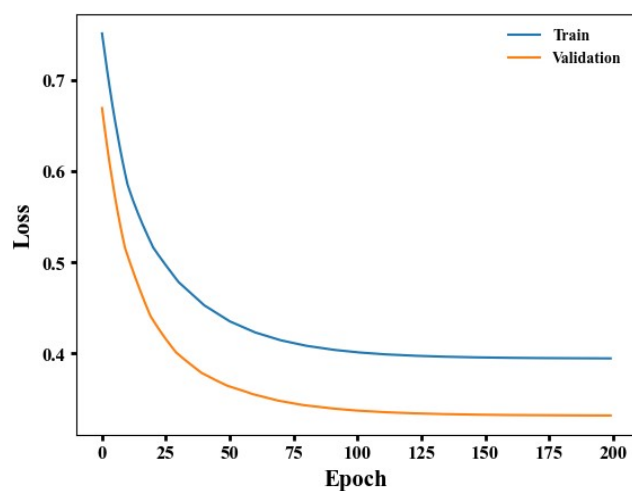

**Fig. S3** Changes in training loss and validation loss during the training epochs in the DNN model.

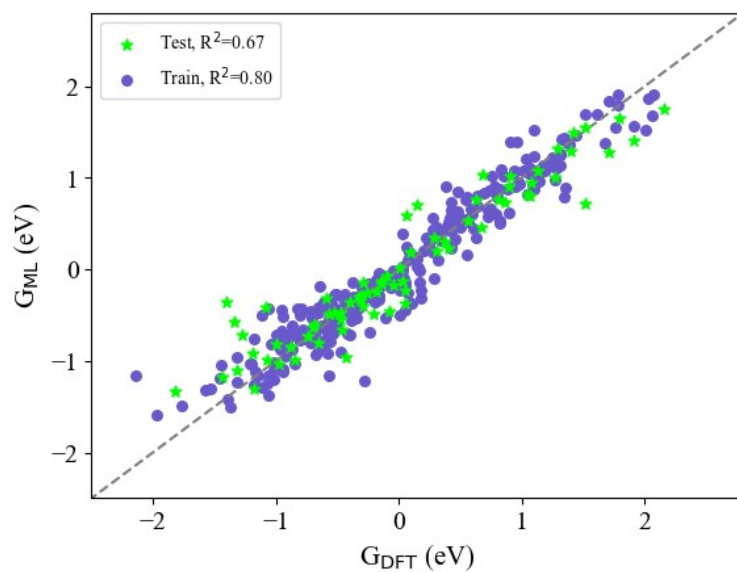

**Fig. S4** Comparison of prediction results between DFT calculations and linear regression model.

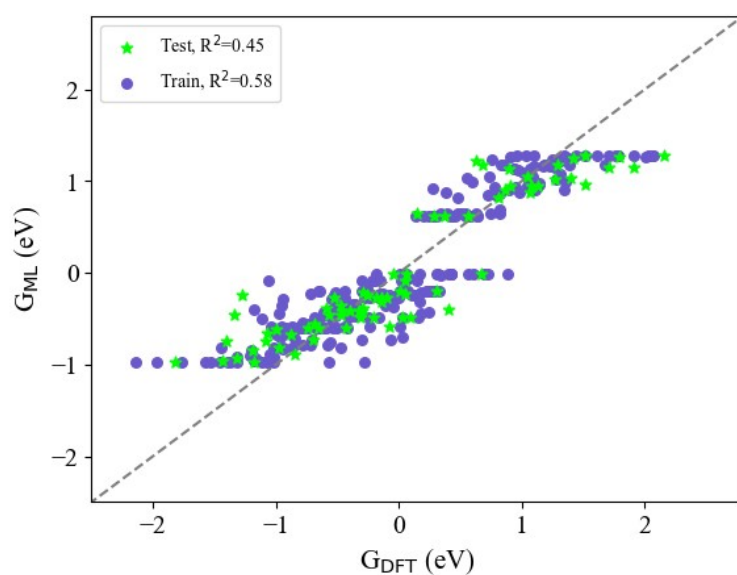

**Fig. S5** Comparison of prediction results between DFT calculations and random forest regression model.

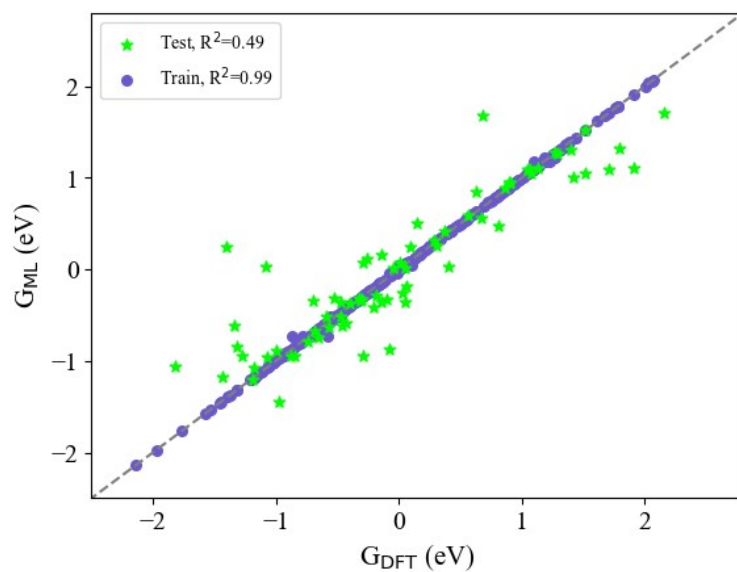

**Fig. S6** Comparison of prediction results between DFT calculations and decision tree regression model.

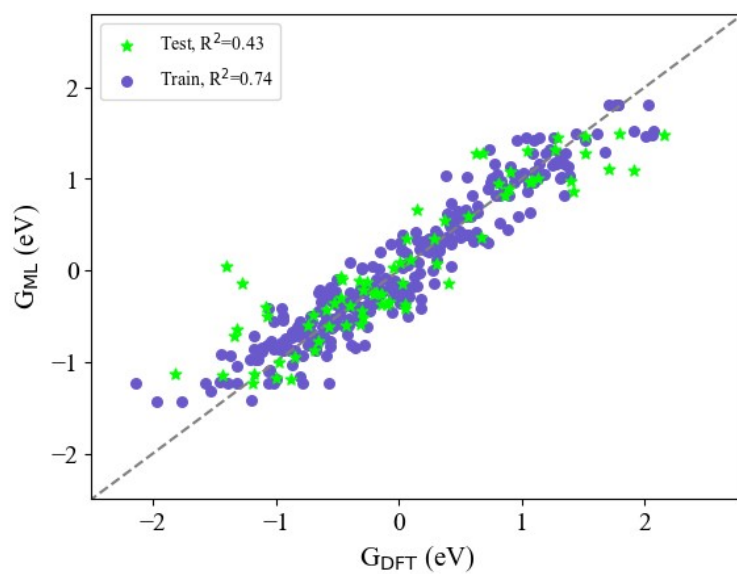

**Fig. S7** Comparison of prediction results between DFT calculations and K-Nearest neighbors regression model.



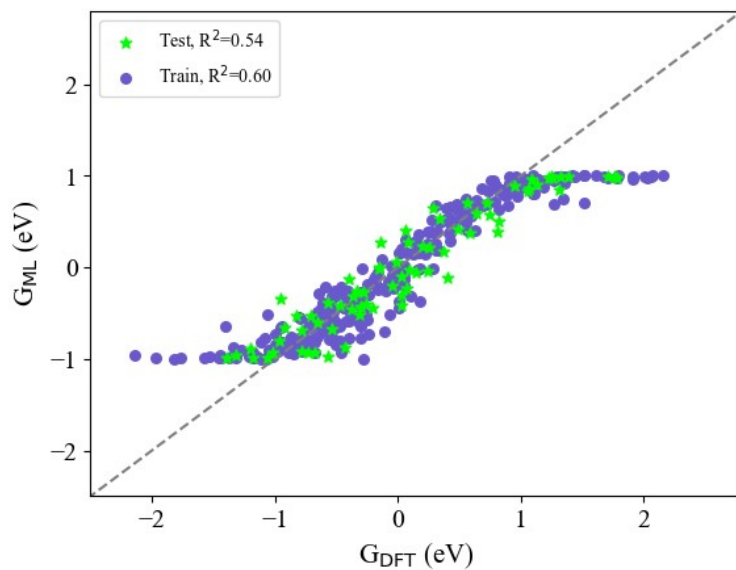

**Fig. S8** Comparison of prediction results between DFT calculations and DNN regression model.

**Table S4** 20 types of SACs that meet the screening criteria under the  $*N_2$  configuration of  $N\equiv N$ ,

$$\Delta E_{ad}[N_2H], N_d, \text{PDS and } U_L.$$

| SACs                               | $N\equiv N$ (Å) | $\Delta E_{ad}[N_2H]$ (eV) | $N_d$ | PDS                                  | $U_L$ (V) |
|------------------------------------|-----------------|----------------------------|-------|--------------------------------------|-----------|
| Nb@g-C <sub>2</sub> N              | 1.145           | -0.622                     | 4     | *N <sub>2</sub> +H→*N <sub>2</sub> H | 0.43      |
| Ta@g-C <sub>2</sub> N              | 1.150           | -0.963                     | 3     | *NH <sub>2</sub> +H→*NH <sub>3</sub> | 0.31      |
| W@g-C <sub>2</sub> N               | 1.149           | -0.755                     | 4     | *N <sub>2</sub> +H→*N <sub>2</sub> H | 0.29      |
| Re@g-C <sub>2</sub> N              | 1.146           | -0.847                     | 5     | *N <sub>2</sub> +H→*N <sub>2</sub> H | 0.50      |
| Nb@g-C <sub>3</sub> N <sub>4</sub> | 1.153           | -0.581                     | 4     | *NH <sub>2</sub> +H→*NH <sub>3</sub> | 0.42      |
| Ta@g-C <sub>3</sub> N <sub>4</sub> | 1.157           | -0.895                     | 3     | *NH <sub>2</sub> +H→*NH <sub>3</sub> | 0.69      |
| Nb@g-C <sub>4</sub> N <sub>3</sub> | 1.137           | -0.299                     | 4     | *N <sub>2</sub> +H→*N <sub>2</sub> H | 0.48      |
| Mo@g-C <sub>4</sub> N <sub>3</sub> | 1.141           | -0.331                     | 5     | *N+H→*NH                             | 0.34      |
| Re@g-C <sub>4</sub> N <sub>3</sub> | 1.143           | -0.629                     | 5     | *N+H→*NH                             | 0.61      |
| Nb@g-C <sub>6</sub> N <sub>6</sub> | 1.145           | -0.770                     | 4     | *N <sub>2</sub> +H→*N <sub>2</sub> H | 0.42      |
| Mo@g-C <sub>6</sub> N <sub>6</sub> | 1.142           | -0.286                     | 5     | *N <sub>2</sub> +H→*N <sub>2</sub> H | 0.54      |
| Ta@g-C <sub>6</sub> N <sub>6</sub> | 1.148           | -0.975                     | 3     | *N <sub>2</sub> +H→*N <sub>2</sub> H | 0.40      |
| W@g-C <sub>6</sub> N <sub>6</sub>  | 1.147           | -0.829                     | 4     | *N <sub>2</sub> +H→*N <sub>2</sub> H | 0.31      |
| Re@g-C <sub>6</sub> N <sub>6</sub> | 1.145           | -0.756                     | 5     | *N <sub>2</sub> +H→*N <sub>2</sub> H | 0.51      |

|                                     |       |        |   |                                      |      |
|-------------------------------------|-------|--------|---|--------------------------------------|------|
| Zr@g-C <sub>9</sub> N <sub>10</sub> | 1.144 | -0.487 | 2 | *N <sub>2</sub> +H→*N <sub>2</sub> H | 0.43 |
| Nb@g-C <sub>9</sub> N <sub>10</sub> | 1.144 | -0.569 | 4 | *N <sub>2</sub> +H→*N <sub>2</sub> H | 0.41 |
| Mo@g-C <sub>9</sub> N <sub>10</sub> | 1.145 | -0.241 | 5 | *N <sub>2</sub> +H→*N <sub>2</sub> H | 0.39 |
| Ta@g-C <sub>9</sub> N <sub>10</sub> | 1.150 | -0.857 | 3 | *N <sub>2</sub> +H→*N <sub>2</sub> H | 0.20 |
| W@g-C <sub>9</sub> N <sub>10</sub>  | 1.132 | -1.138 | 4 | *N <sub>2</sub> +H→*N <sub>2</sub> H | 0.27 |
| Re@g-C <sub>9</sub> N <sub>10</sub> | 1.143 | -1.117 | 5 | *N <sub>2</sub> +H→*N <sub>2</sub> H | 0.34 |

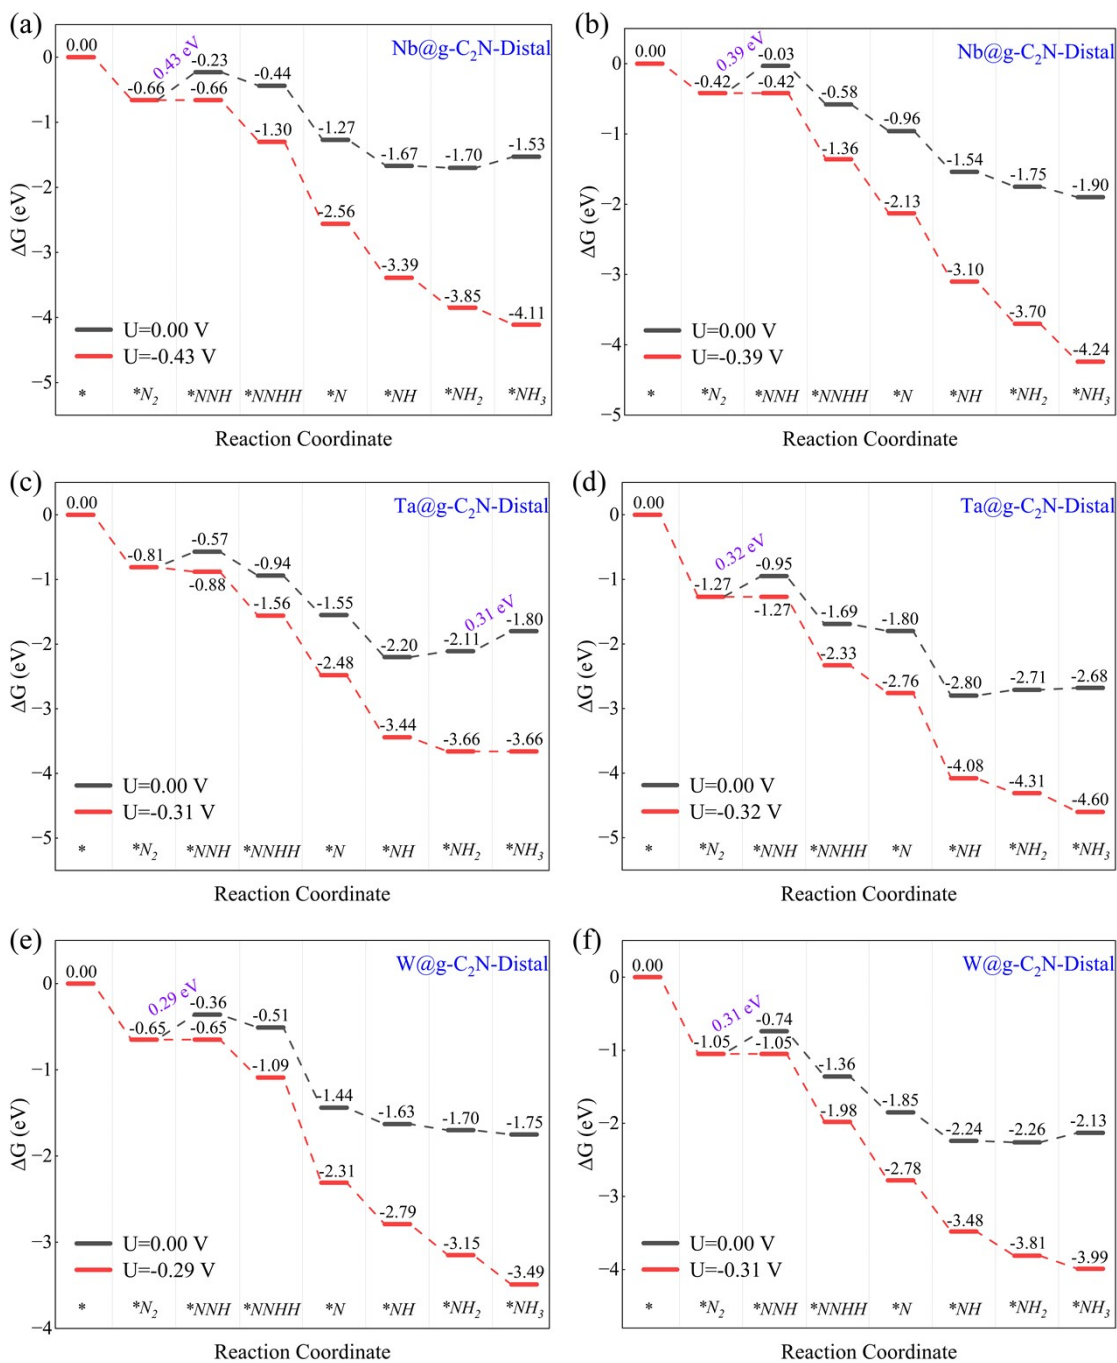

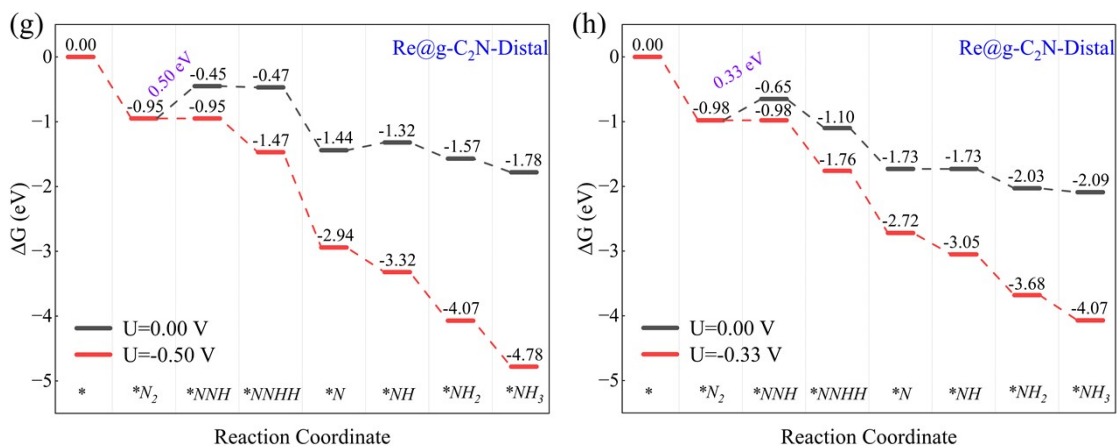

**Fig. S9** Gibbs free energy change diagram of Nb, Ta, W, Re@g-C<sub>2</sub>N along the distal pathway under (a, c, e, g) vacuum and (b, d, f, h) implicit solvation.

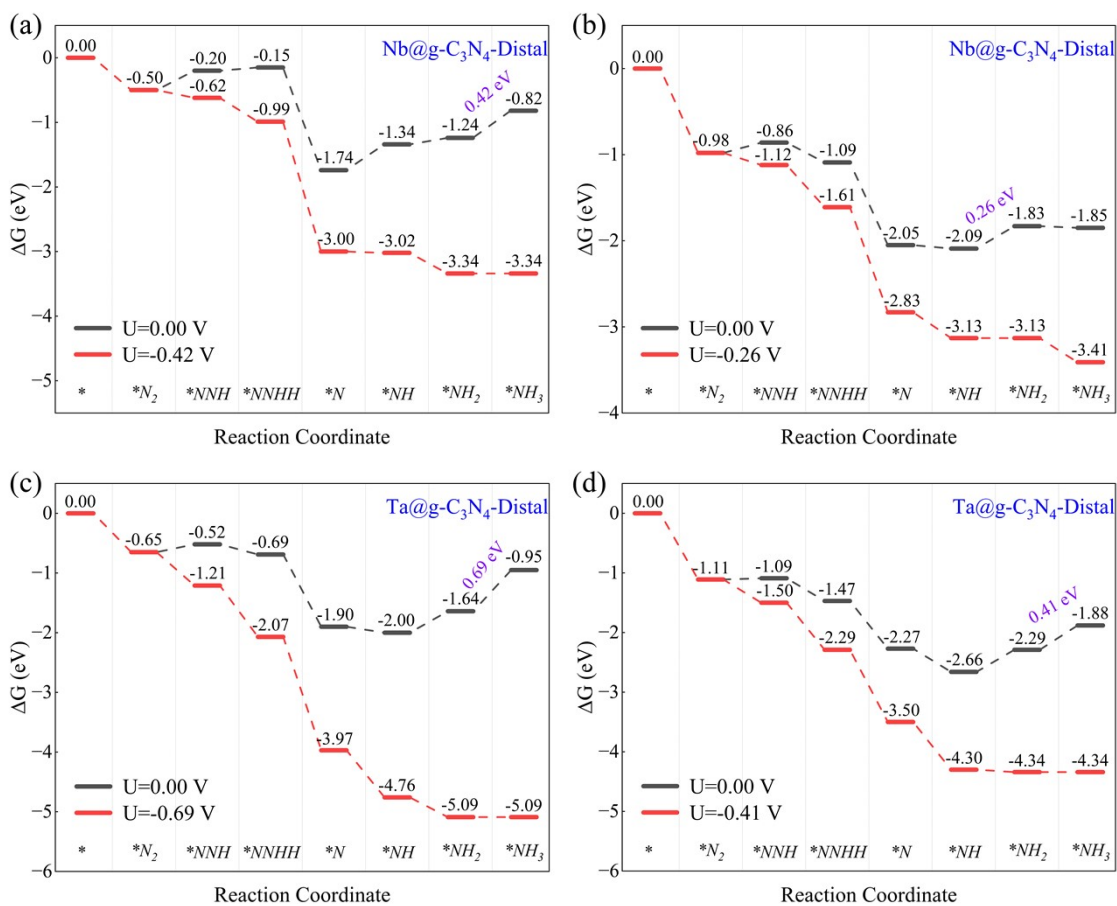

**Fig. S10** Gibbs free energy change diagram of Nb, Ta@g-C<sub>3</sub>N<sub>4</sub> along distal pathway under (a, c) vacuum and (b, d) implicit solvation.

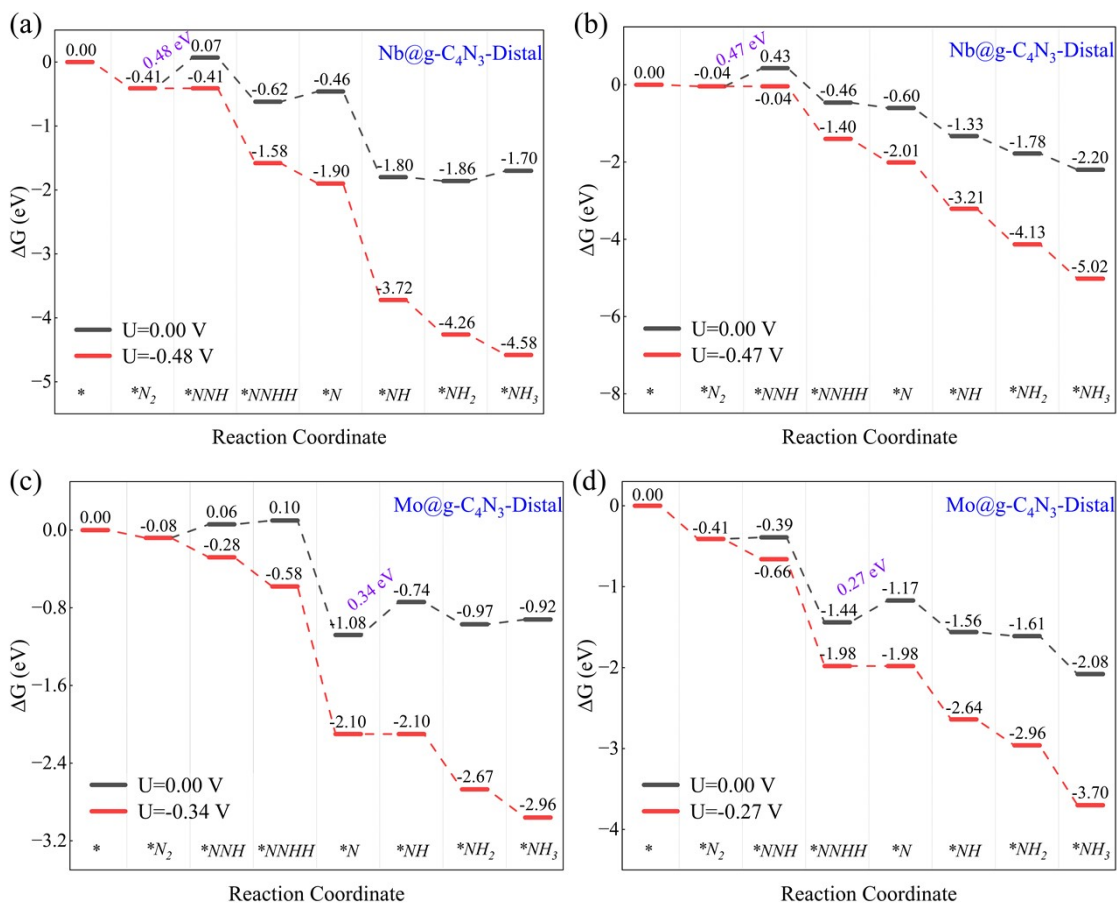

**Fig. S11** Gibbs free energy change diagram of Nb, Mo@g-C<sub>4</sub>N<sub>3</sub> along the distal pathway under (a, c) vacuum and (b, d) implicit solvation.

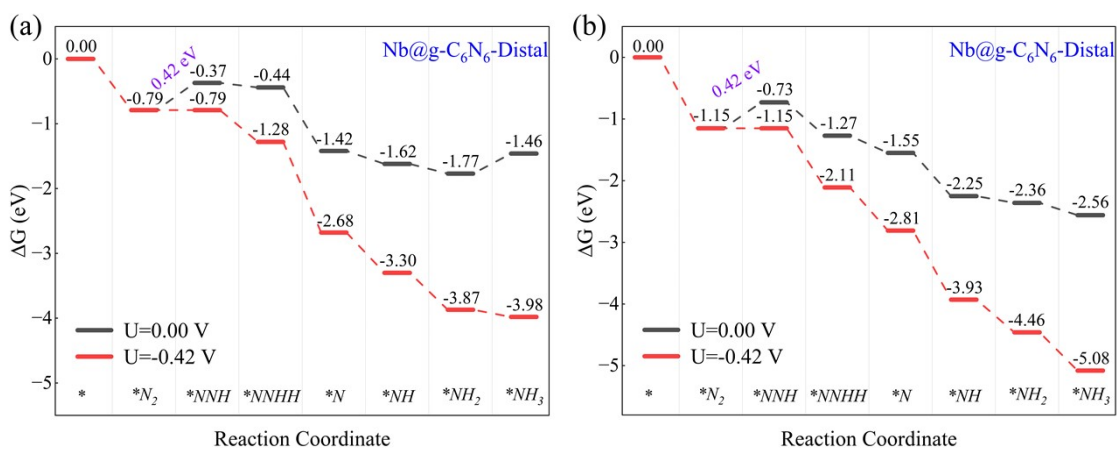

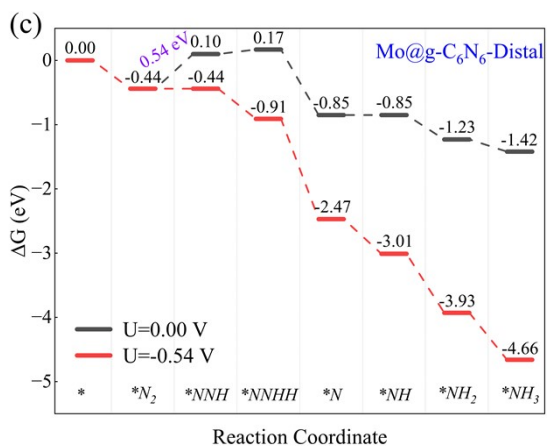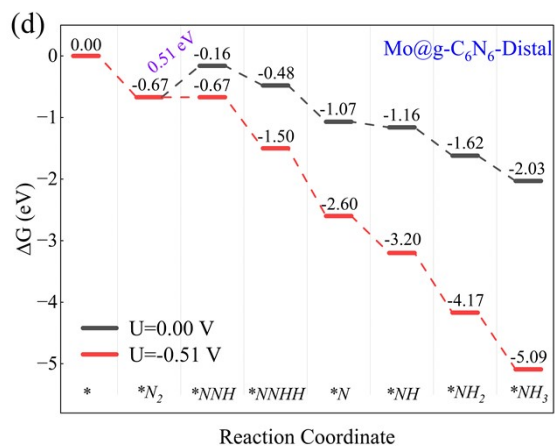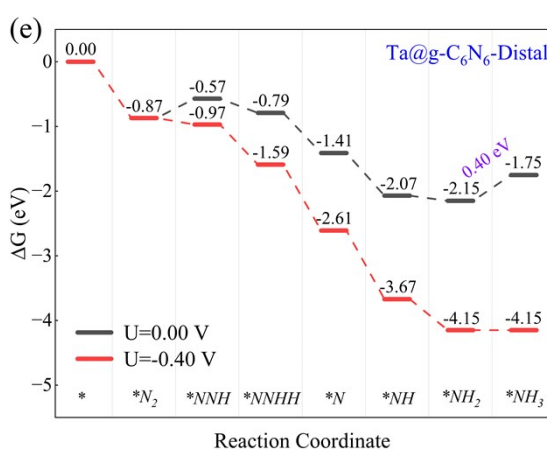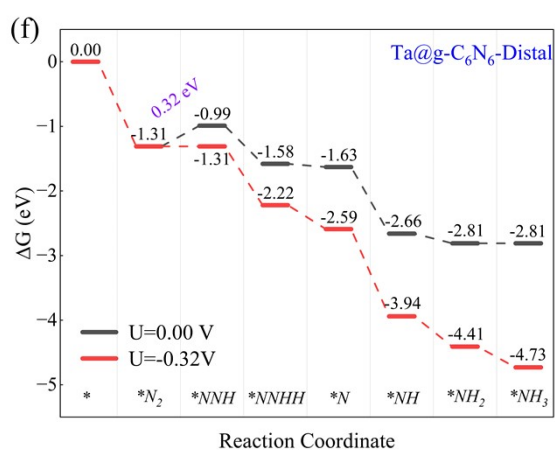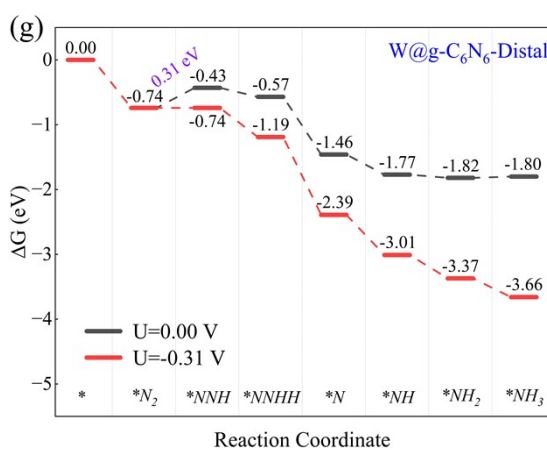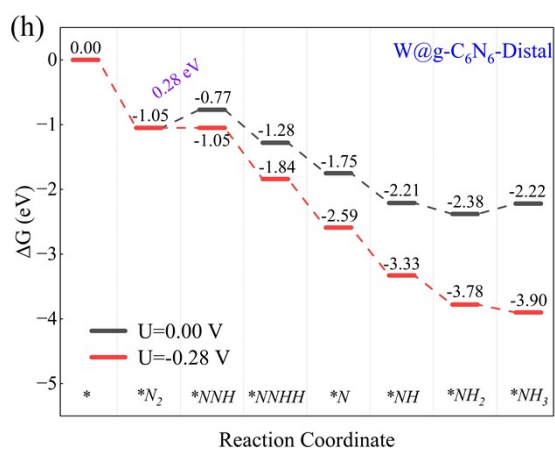

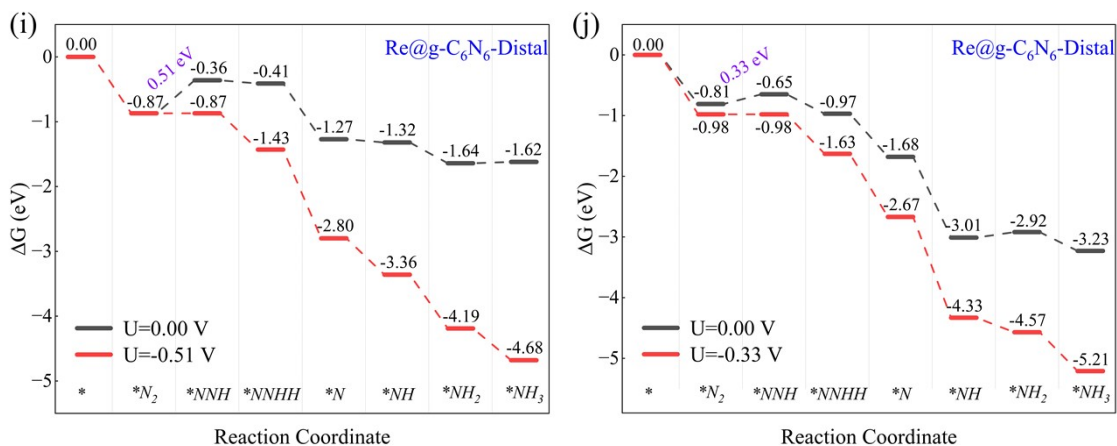

**Fig. S12** Gibbs free energy change diagram of Nb, Mo, Ta, W, Re@g-C<sub>6</sub>N<sub>6</sub> along the distal pathway under (a, c, e, g, i) vacuum and (b, d, f, h, j) implicit solvation.

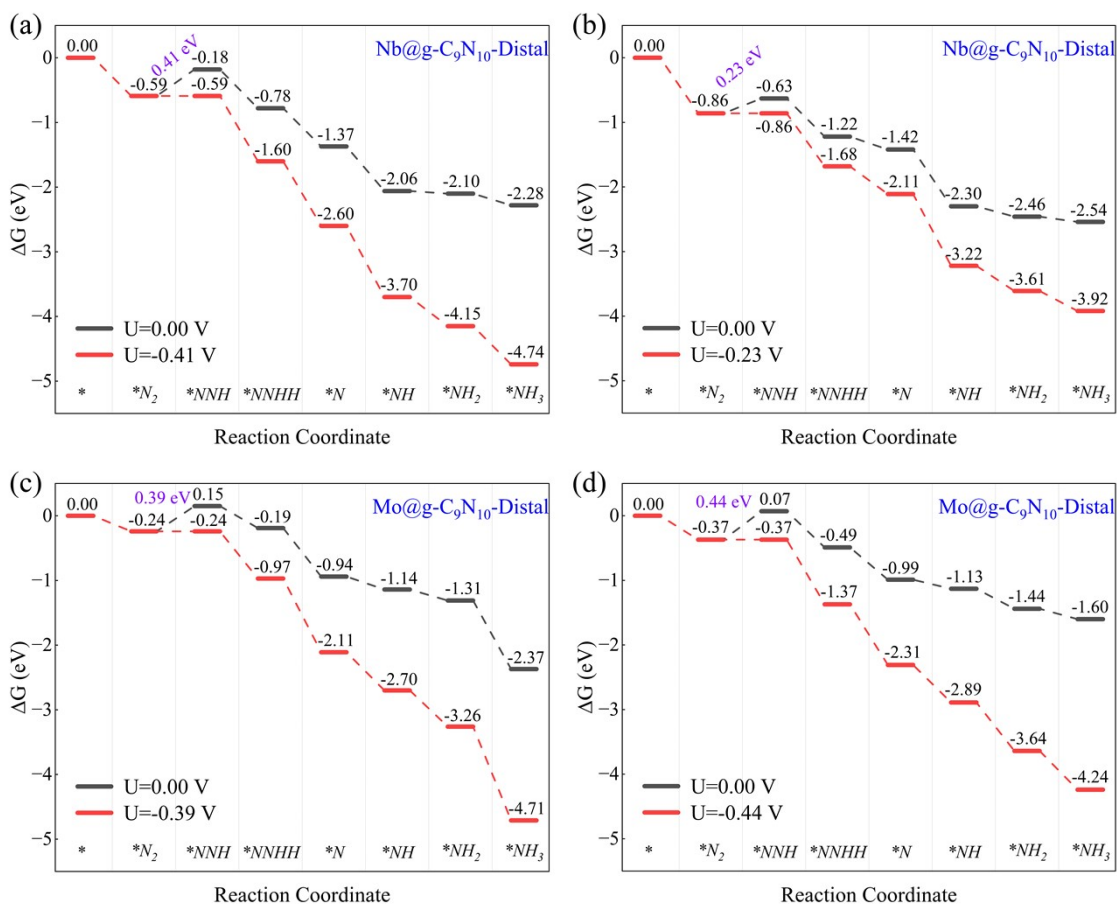

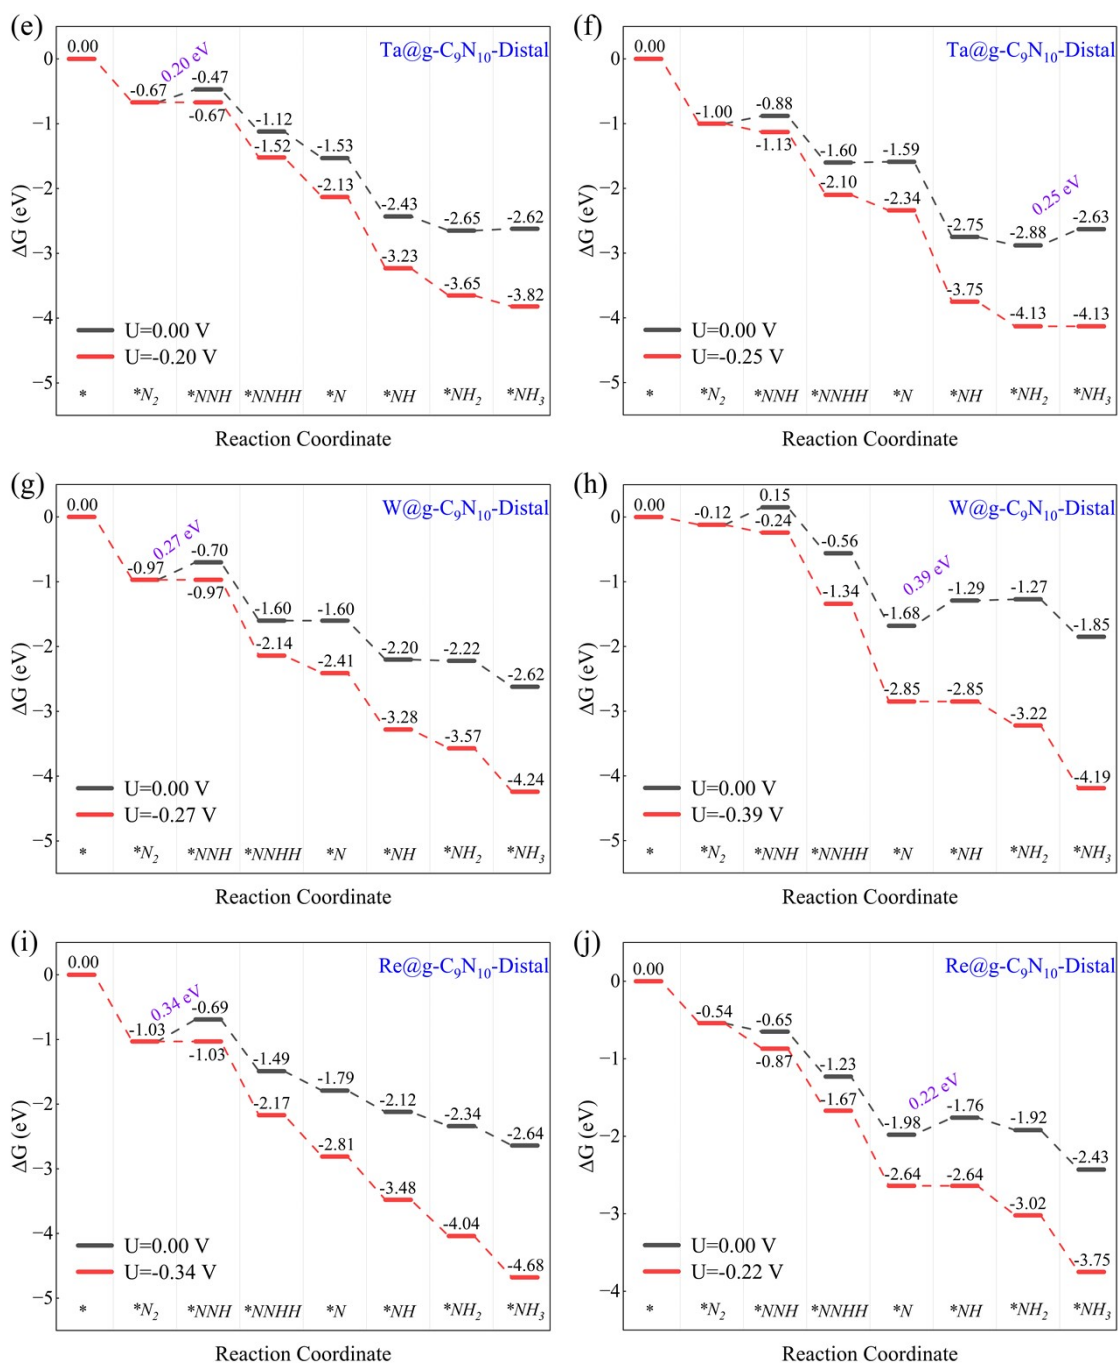

**Fig. S13** Gibbs free energy change diagram of Nb, Mo, Ta, W, Re@ $g\text{-C}_9\text{N}_{10}$  along distal pathway under (a, c, e, g, i) vacuum and (b, d, f, h, j) implicit solvation.

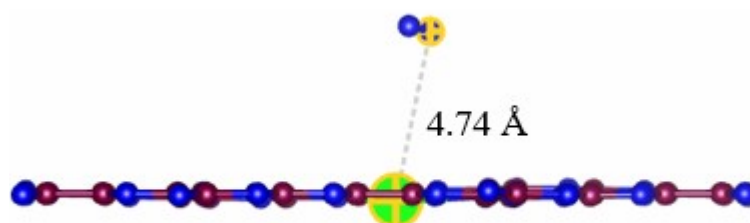

**Fig. S14**  $\text{N}_2$  is physically adsorbed onto  $\text{Zr}@g\text{-C}_9\text{N}_{10}$  under implicit solvation conditions.
